# Supplementary figures and images for: Altered basal ganglia output during self-restraint
Source: eLife journal article supplement (doi:10.7554/elife.82143), 2022-11-02

**Figure 4 Supp. 2**

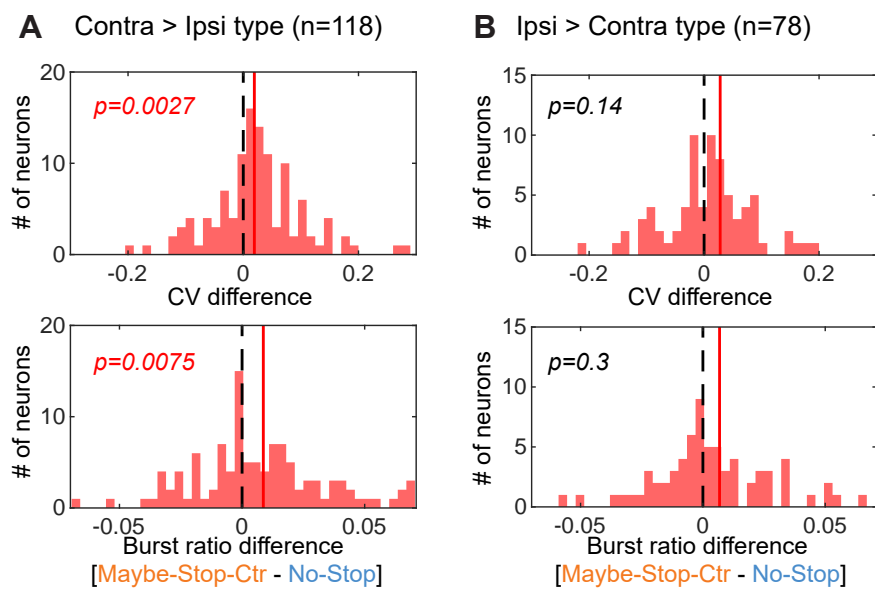

Supplement: supp [file elife-82143-supp-v1.zip]

Figure 2 Supp. 2

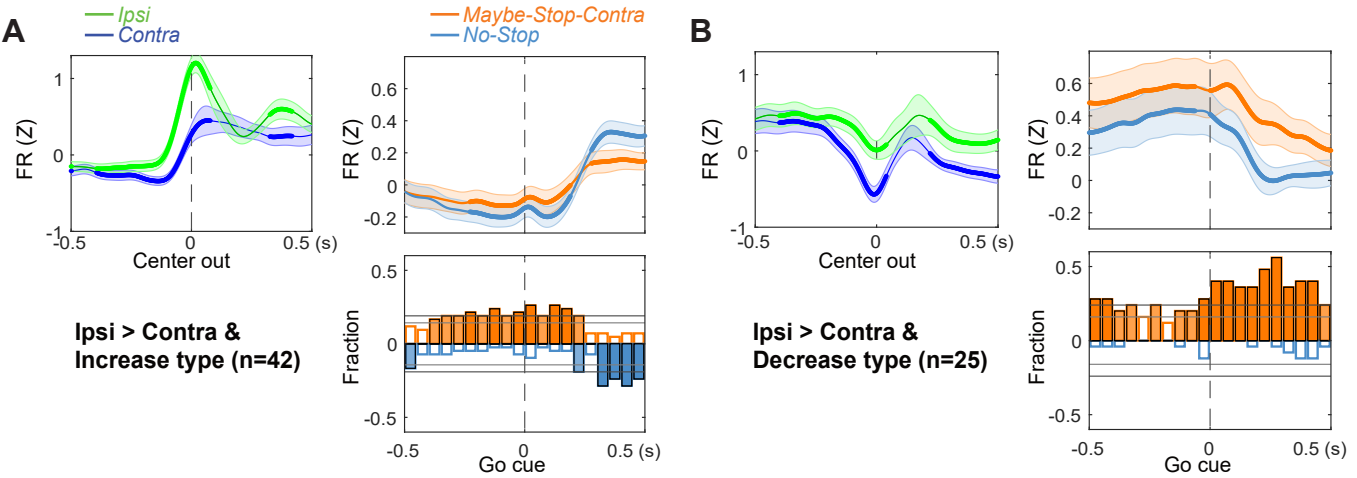

Supplement: supp [file elife-82143-supp-v1.zip]

**Figure 6 Supp. 1**

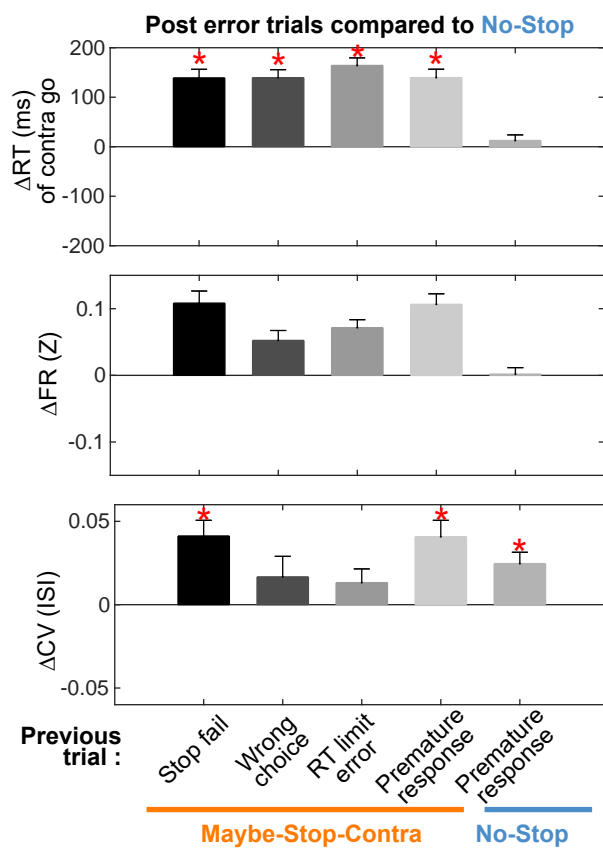

Supplement: supp [file elife-82143-supp-v1.zip]

**Figure 4 Supp. 1**

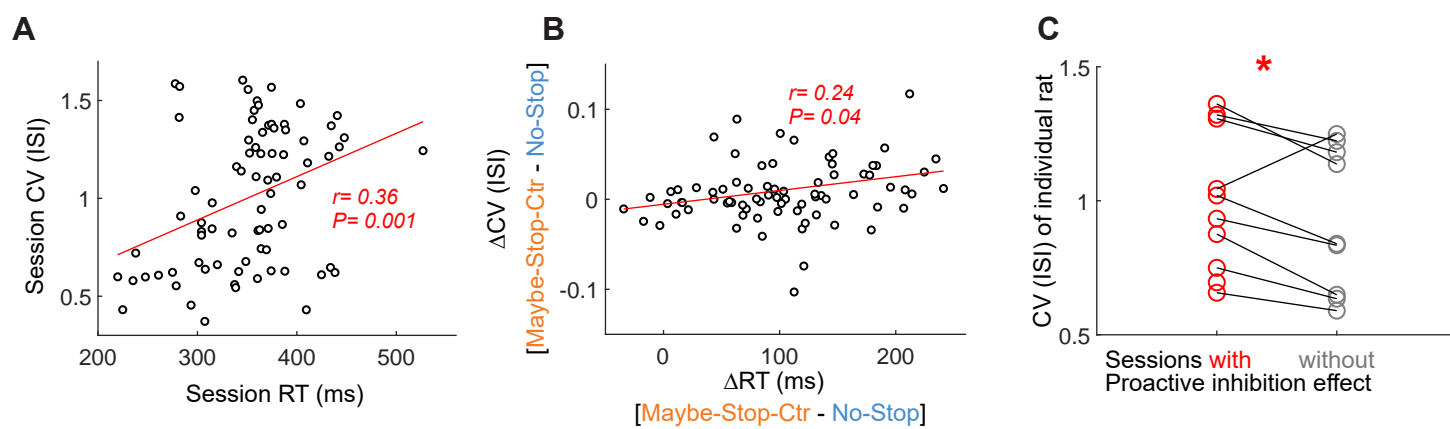

Supplement: supp [file elife-82143-supp-v1.zip]

Figure 2 Supp. 1

**A** Staining examples

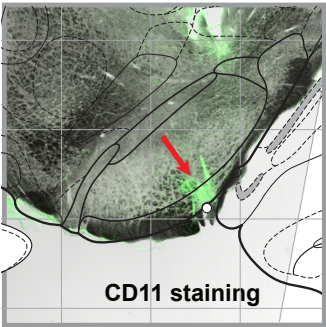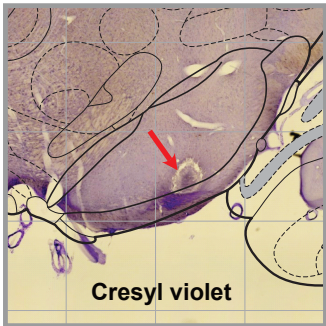

**B**

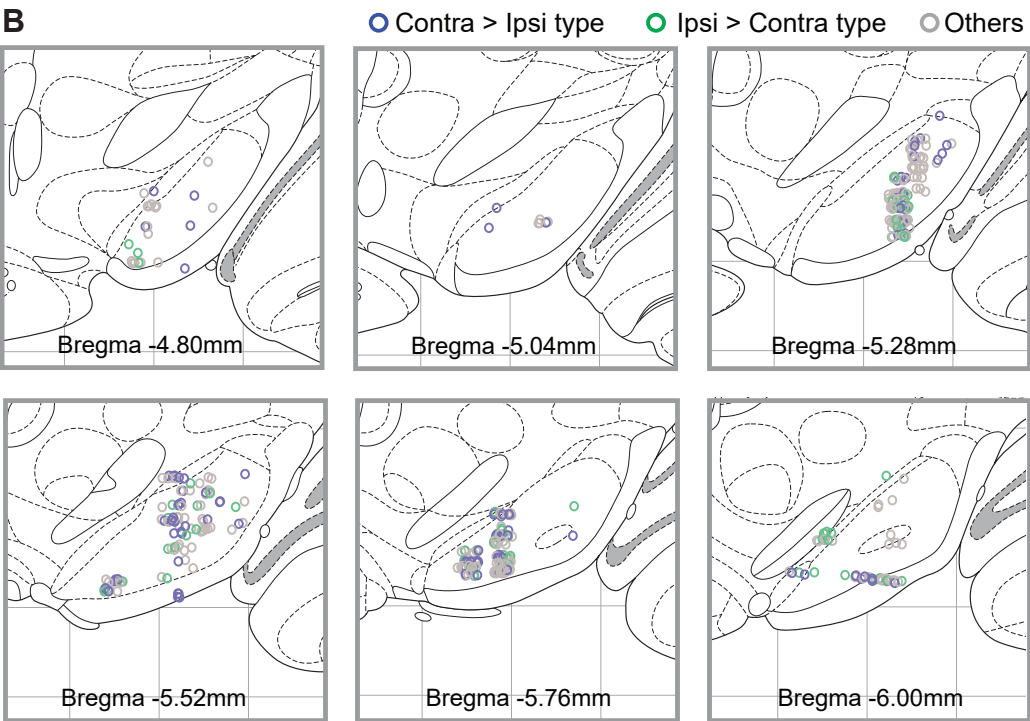

Supplement: supp [file elife-82143-supp-v1.zip]

**Figure 3 Supp. 1**

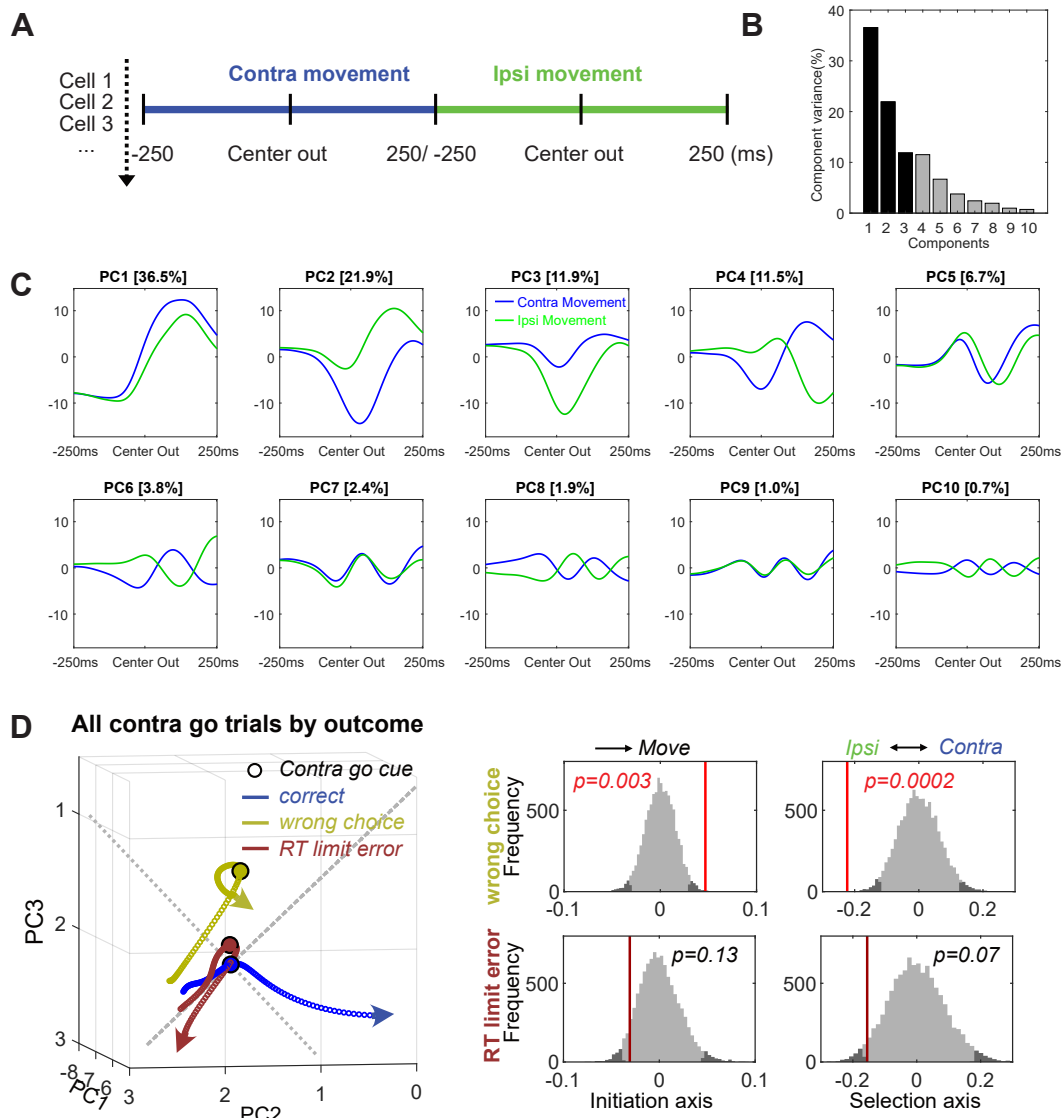

Supplement: supp [file elife-82143-supp-v1.zip]

**Figure 4 Supp. 3**

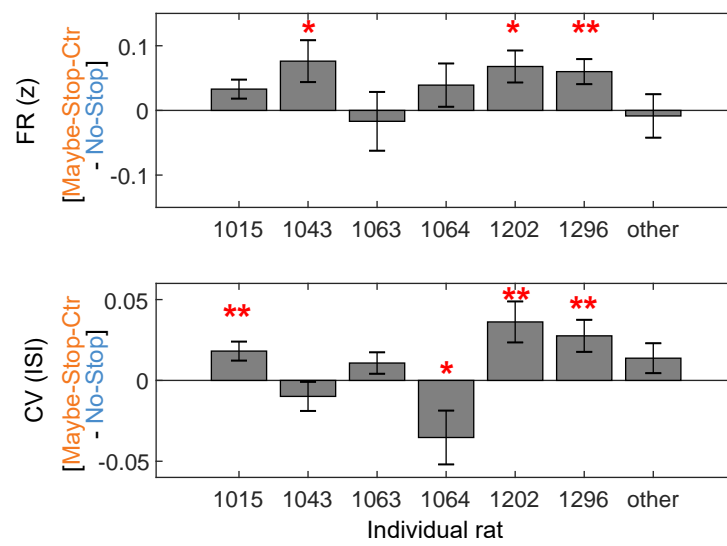

Supplement: supp [file elife-82143-supp-v1.zip]

**Figure 2 Supp. 3**

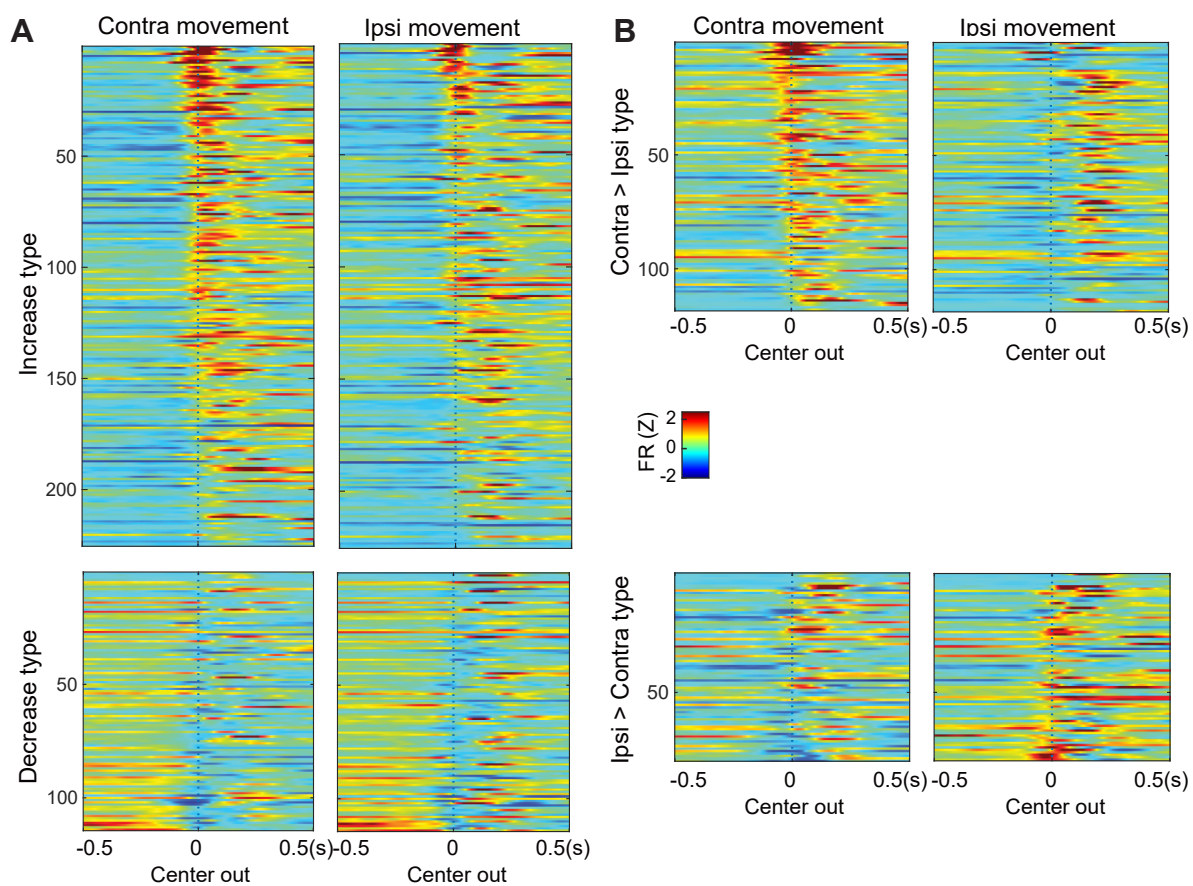

Supplement: supp [file elife-82143-supp-v1.zip]
